# Supplementary material for: Analysis of the structure and abnormal photoluminescence of a red-emitting LiMgBO3:Mn2+ phosphor
Source: Royal Society of Chemistry journal article supplement (doi:10.1039/c8dt02450b), 2018-01-01
Supplement: c8dt02450b1.pdf [file c8dt02450b1.pdf]

## Electronic Supplementary Information

### Structure and Abnormal Photoluminescence of a Red-Emitting LiMgBO<sub>3</sub>: Mn<sup>2+</sup> phosphor

Liwei Wu<sup>a</sup>, Yuxing Bai<sup>a</sup>, Li Wu<sup>a,\*</sup>, Huan Yi<sup>a</sup>, Xinzheng Zhang<sup>a</sup>, Lixin Zhang<sup>a</sup>, Yongfa Kong<sup>a</sup>, Yi Zhang<sup>b,\*</sup>,  
Jingjun Xu<sup>a</sup>

<sup>a</sup>Key laboratory of Weak-Light Nonlinear Photonics, Ministry of Education, School of Physics, Nankai University,  
Tianjin 300071, China. Email: \*[lwu@nankai.edu.cn](mailto:lwu@nankai.edu.cn)

<sup>b</sup>College of Electronic Information and Optical Engineering and Tianjin Key Laboratory of Photo-electronic Thin Film  
Devices and Technology, Nankai University, Tianjin 300071, China. Email: \*[yizhang@nankai.edu.cn](mailto:yizhang@nankai.edu.cn)

**Table S1** Li(1)–O, Li(2)–O bonds valence of LiMgBO<sub>3</sub>

|          | Li1    | Li2    |
|----------|--------|--------|
| O1       | 0.2052 | 0.2808 |
| O2       | 0.3258 | 0.2554 |
| O3       | 0.3293 | 0.3171 |
|          | 0.1464 | 0.0963 |
|          | 0.0247 | 0.0373 |
| $\sum s$ | 1.0314 | 0.9869 |

**Table S2** Fractional Atomic Coordinates, Equivalent Isotropic Displacement Parameters ( $\text{\AA}^2$ ) and Occupancy forLiMgBO<sub>3</sub>: 0.04Mn<sup>2+</sup>

| site                                       | x  | y          | z         | Ueq       | occupancy |          |
|--------------------------------------------|----|------------|-----------|-----------|-----------|----------|
| LiMgBO <sub>3</sub> : 0.04Mn <sup>2+</sup> |    |            |           |           |           |          |
| Li1                                        | 8f | 0.1968(11) | 0.5104(7) | 0.1509(3) | 0.0299(6) | 0.553(7) |
| Mn1                                        | 8f | 0.1968(11) | 0.5104(7) | 0.1509(3) | 0.0299(6) | 0.022(7) |
| Li2                                        | 8f | 0.1664(14) | 0.4911(8) | 0.1092(5) | 0.0200(1) | 0.407(4) |
| Mn2                                        | 8f | 0.1664(14) | 0.4911(8) | 0.1092(5) | 0.0200(1) | 0.016(4) |
| Mg                                         | 8f | 0.1560(2)  | 0.1668(1) | 0.1244(1) | 0.0236(3) | 1.0000   |
| B                                          | 8f | 0.1613(6)  | 0.8271(3) | 0.1287(2) | 0.0465(5) | 1.0000   |
| O1                                         | 8f | 0.4042(2)  | 0.3330(1) | 0.0869(1) | 0.0267(6) | 1.0000   |
| O2                                         | 8f | 0.2893(2)  | 0.6930(1) | 0.1635(1) | 0.0446(9) | 1.0000   |
| O3                                         | 8f | 0.3087(2)  | 0.9627(1) | 0.1282(1) | 0.0520(6) | 1.0000   |

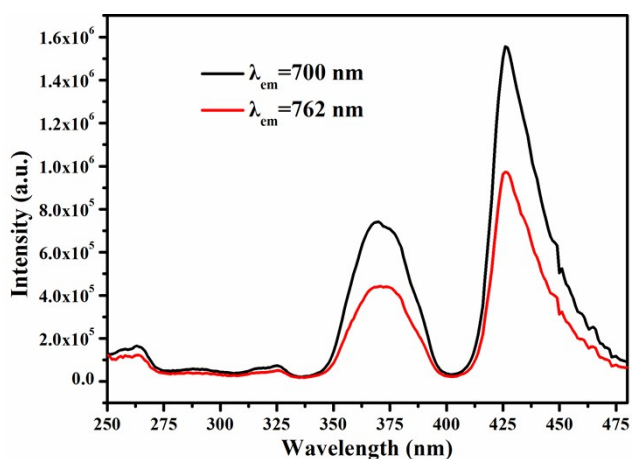**Figure S1** Excitation spectra of LiMgBO<sub>3</sub>: 0.04Mn<sup>2+</sup> monitored at 700 nm and 762 nm.

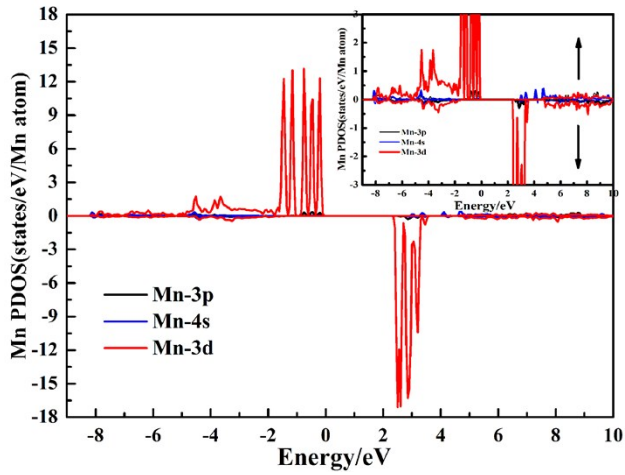

**Figure S2** The orbital-decomposed DOS spectra of Mn ion in  $\text{LiMgBO}_3: 0.04\text{Mn}$ . The energy reference is set as the top of electron occupation. The upper and lower rows are corresponding to majority spin (spin-up) and minority spin (spin-down), respectively.

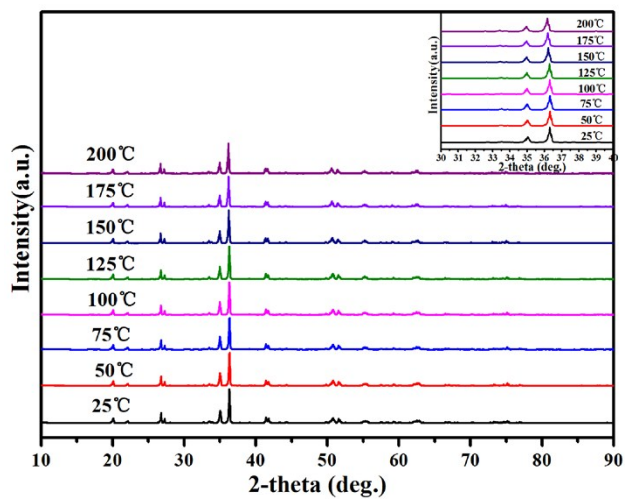

**Figure S3** Temperature-dependent XRD patterns of  $\text{LiMgBO}_3: 0.04\text{Mn}^{2+}$ .
